# Supplementary material for: Leptin-Mediated Induction of IL-6 Expression in Hofbauer Cells Contributes to Preeclampsia Pathogenesis
Source: MDPI journal article supplement (doi:10.3390/ijms25010135), 2023-12-21
Supplement: s1 [file s1]

Supplementary Materials:

Supplementary Figure S1.

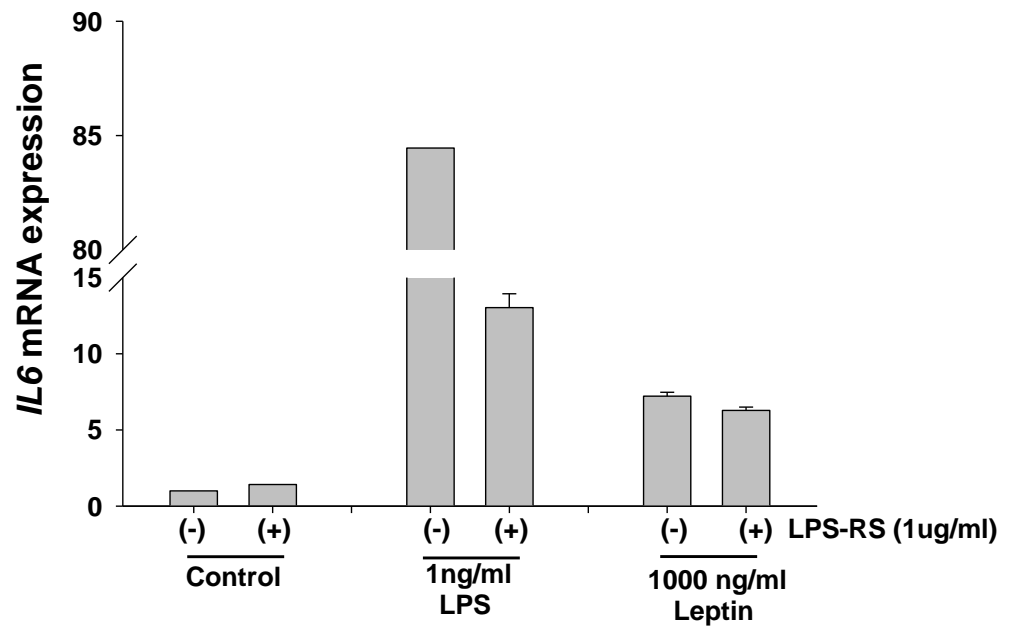

**Supplementary Figure S1. Evaluation of the effect of residual endotoxin contamination of r-leptin on IL-6 expression.** *IL-6* mRNA expression in primary cultured Hofbauer cells that were pre-incubated with 1 $\mu$ g/ml LPS antagonist (LPS-RS) for 1h, then incubated with either 1ng/ml LPS or 1000 ng/ml r-leptin for 6 h. LPS-RS treatment downregulated LPS-induced IL-6 mRNA levels, but no effect on r-leptin-induced IL-6 mRNA levels. Bars represent mean $\pm$  SEM, n=2 repeat from one cultured Hofbauer cells.

Supplementary Figure S2.

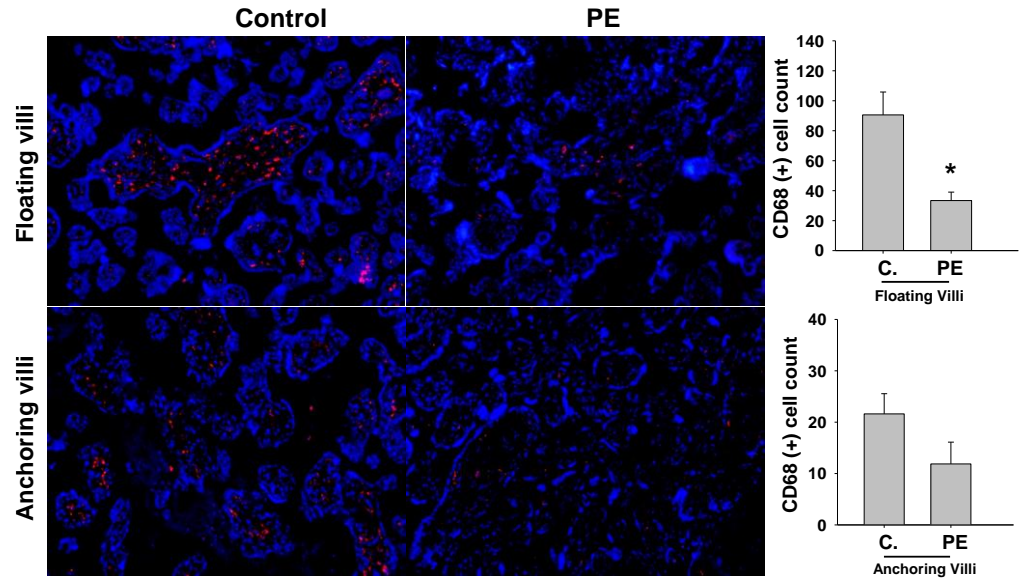

**Supplementary Figure S2. CD68 (+) HBCs in control vs. PE placentas.** Immunohistochemistry revealed a smaller number of CD68(+) cells both in floating villi ( $33.40 \pm 5.63$  vs.  $90.53 \pm 15.28$ ,  $p < 0.05$ ) and anchoring villi ( $11.87 \pm 4.24$  vs.  $21.60 \pm 3.94$ ,  $p = 0.131$ ) of PE placentas compared to their GA- match controls. Red:CD68 (+) staining, blue: DAPI counterstaining. Magnification 20x. PE: Preeclampsia, Bars represent mean  $\pm$  SEM,  $n = 5$ , \*:  $p < 0.05$  analyzed by Mann Whitney Rank Sum test.
